# Supplementary material for: Modulated Fluorescence in LB Films Based on DADQs—A Potential Sensing Surface?
Source: MDPI journal article supplement (doi:10.3390/molecules27123893), 2022-06-17
Supplement: s1 [file s1]

## Supplementary information - Sensing surfaces based on functionalised fluorescent dicynaquinomethane Langmuir-Blodgett films.

Marek Szablewski <sup>1</sup>, Richard L. Thompson <sup>2</sup> and Lars-Olof Pålsson <sup>2,\*</sup>

<sup>1</sup> Department of Physics, Durham University DH1 3LE, UK;

marek.szablewski@durham.ac.uk

<sup>2</sup> Department of Chemistry, Durham University, DH1 3LE, UK;

richard.l.thompson@durham.ac.uk

\* Correspondence: lars-olof.palsson@durham.ac.uk; Tel.: +44-(0)191-3342135

### Synthetic procedures.

Three different amphiphilic DADQs (with single R1 functional groups structures) for LB film fabrication were used in this study; **1** (2-(4-(5-(hydroxymethyl)-1,3-oxazinan-2-ylidene)cyclohexa-2,5dien-1-ylidene)malononitrile), **2** (2-(4-(4-butyloxazolidin-2-ylidene)cyclohexa-2,5-dien-1-ylidene)malononitrile) and **3** (2-(4-((hexylamino)(3-hydroxypyrrolidin-1-yl)methylene)cyclohexa-2,5-dien-1-ylidene)malononitrile). Synthetic procedures for **1**, **2** and **3** followed the methods outlined in (REF), for these type of adducts.

Compounds **1** and **2** were prepared by adding a slight excess of 2-(aminomethyl)-1,3-propanediol, or 2-amino-1-hexanol respectively to a warm solution of TCNQ in acetonitrile. The solution was stirred with heating for 2.5 hrs, and then left to cool slowly. The products were collected as yellow fibrous microcrystals by filtration by gravity. They were subsequently recrystallized from hot acetonitrile or methanol and dried in vacuo. Typically the yield was in the region of 50%.

Compound **1** <sup>1</sup>H NMR, (d<sub>6</sub>DMSO), δ 3.4-3.6 ppm, broad singlet/multiplet and multiplet, heterocycle -CH<sub>2</sub> (x2), δ 4.5-4.9 ppm, 3 multiplets, heterocycle -(CH)- and exocyclic -(CH)<sub>2</sub>-, δ 4.4 ppm, broad singlet (OH), δ 6.85 & 7.65 ppm, doublet of doublets, quinoidal ring -(CH) x4, δ 12.4 ppm (approx.) broad singlet (NH). λ<sub>max</sub> (solvent) xxx nm, Microanalysis: Calculated for C<sub>14</sub>H<sub>13</sub>N<sub>3</sub>O<sub>2</sub>: C, 65.87; N, 16.46; H, 5.13%. Found: C, 61.21; N, 16.47; H, 4.19 %

Compound **2**: -(620 mg) 48% yield. <sup>1</sup>H NMR, (CD<sub>2</sub>Cl<sub>2</sub>) shows characteristic doublet of doublets centred around δ 7.2 ppm and N-H band, all aliphatic signals compressed. Mass spectrum: m/z, M+ 267. (100%, Molecular ion), ir: (KBr disc) ν(nitrile) 2179, 2132 cm<sup>-1</sup>, (characteristic doublet of C≡N stretch in such species), λ<sub>max</sub> (acetone) 424 nm, Mp/decomp temp approx. 230°C. Microanalysis: Calculated for C<sub>16</sub>H<sub>17</sub>N<sub>3</sub>O: C, 71.89; N, 15.72; H, 6.41%. Found: C, 71.75; N, 15.74; H, 6.37%.

Compound **3** was prepared in two stages, firstly a slight excess of 3-pyrroldinol was added to a solution of TCNQ in THF, when the solution turned purple, it was warmed to 50 °C, and left for 20 hours, after which it was allowed to cool. The product was isolated as a

Commented [SM1]: Need to add lambda max from the students report.

Commented [SM2]: The micro analysis is not really v good, perhaps better not to include? Compare to how good compound 2 micro is. Really annoyed by this. Could try to do a MS that would fix it.

dark purple powder by filtration by gravity, and recrystallized from hot acetonitrile. The yield was typically in the region of 80%.

The purple powder prepared above was dissolved in warm THF and a large excess of hexylamine was added. The reaction was left at 30 C for 4 hours. After cooling, compound **3**, a light yellow powder, was collected by filtration, and recrystallized from ethyl acetate. The yield was typically in the region of 30%

### Compound **3**

#### *Optical spectroscopy.*

Due to the low absorption cross-section it was very difficult to record absorption spectra of the LB films. Fluorescence spectra of the LB films could be recorded though, due to high sensitivity of the spectrometer used. The spectra are shown in figure S1. Fluorescence spectra were recorded using a Jobin Yvon Horiba Fluoromax 3. Microscope slides were mounted at an angle of ~45 degrees relative to normal of the incoming excitation light, facing the detection port. To minimise scattered light, the excitation slit width was set to 2.5 nm and the detection to 1.5 nm (band pass).

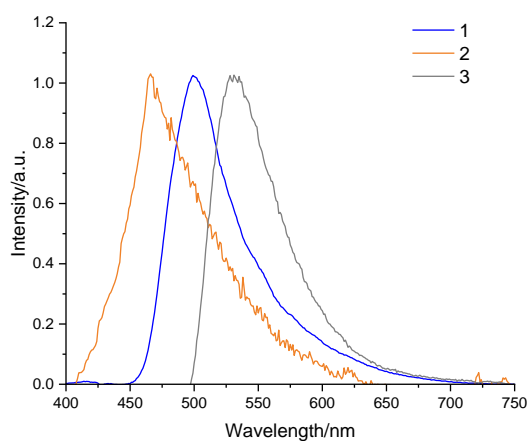

**Figure S1.** Normalised fluorescence spectra of pristine LB films of **1**, **2** and **3**. Excitation is at 385 nm. The number of deposited layers is 2.

1

2

3

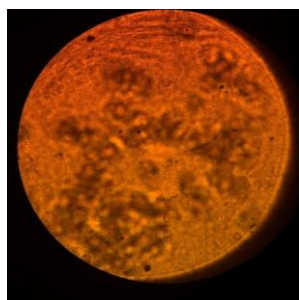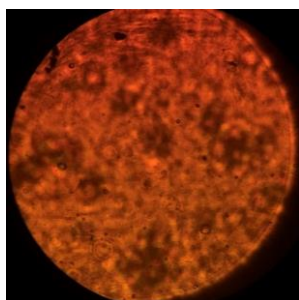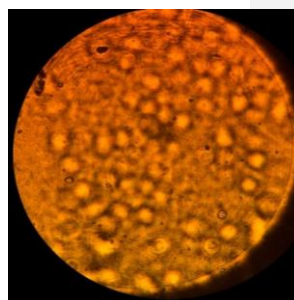

**Figure S2.** Normal camera images of the LB films of **1**, **2** and **3** (pristine/blank films) as viewed in the microscope. The images are contrast images from a white light light source but filtered by a 595 nm longpass filter. The dimension of the images is a diameter of 15  $\mu\text{m}$ .

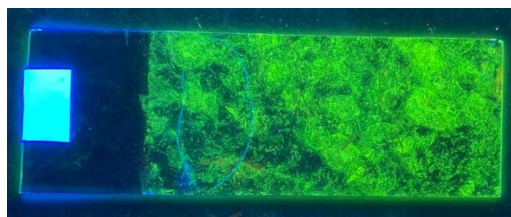

**Figure S3.** Fluorescence from a full sized microscope slide of the pristine LB film of **3** under UV excitation.

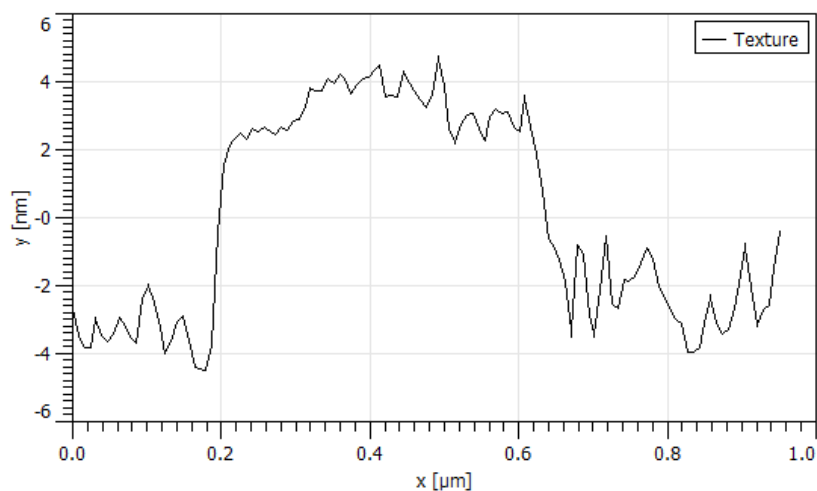

**Figure S4.** Cross-sectional AFM height profile of the texture for a droplet of HA deposition.

**Table S1.** The complete set data from the time-resolved fluorescence microscopy experiments for the data that is presented in figure 6 but without uncertainties. These were obtained through repeated measurements on a few different LB films surface points. Fitted fluorescence lifetimes and amplitudes from LB films of 1 in the two left columns. “top” and “den” (denominator) refer to the terms as defined in equation 2.

| $\tau/\text{ns}$ | amp./a.u. | top      | den      | sum top  | sum den  | $\langle \tau \rangle / \text{ns}$ | Chi sq |
|------------------|-----------|----------|----------|----------|----------|------------------------------------|--------|
| 1 blank          |           |          |          |          |          |                                    |        |
| 2.5858           | 0.0594    | 0.39717  | 0.153597 | 0.551723 | 0.486008 | 1.135214                           | 0.908  |
| 0.2147           | 0.6321    | 0.029137 | 0.135712 |          |          |                                    |        |

|         |         |          |          |          |          |          |       |
|---------|---------|----------|----------|----------|----------|----------|-------|
| 0.6376  | 0.3085  | 0.125416 | 0.1967   |          |          |          |       |
| 1 NiO   |         |          |          |          |          |          |       |
| 0.6699  | 0.2829  | 0.126956 | 0.189515 | 0.486074 | 0.465129 | 1.04503  | 0.908 |
| 0.2263  | 0.6696  | 0.034291 | 0.15153  |          |          |          |       |
| 2.6178  | 0.0474  | 0.324826 | 0.124084 |          |          |          |       |
| 1 Bis A |         |          |          |          |          |          |       |
| 3.133   | 0.0104  | 0.102083 | 0.032583 | 0.121591 | 0.074315 | 1.636166 | 1.035 |
| 0.7239  | 0.03017 | 0.01581  | 0.02184  |          |          |          |       |
| 0.1859  | 0.107   | 0.003698 | 0.019891 |          |          |          |       |
| 1 HA    |         |          |          |          |          |          |       |
| 3.7202  | 1.001   | 13.83989 | 3.7202   | 76.81469 | 20.60284 | 3.728354 | 1.036 |
| 0.5699  | 0.0014  | 0.000455 | 0.000798 |          |          |          |       |
| 3.7303  | 4.5256  | 62.97435 | 16.88185 |          |          |          |       |
| 1 HSA   |         |          |          |          |          |          |       |
| 0.442   | 0.7594  | 0.148359 | 0.335655 | 1.018853 | 0.70192  | 1.451524 | 1.393 |
| 2.3892  | 0.3361  | 1.918552 | 0.80301  |          |          |          |       |
| 2.3997  | -0.182  | -1.04806 | -0.43675 |          |          |          |       |

**Table S2.** The complete set data from the time-resolved fluorescence microscopy experiments for the data that is presented in figure 6 but without uncertainties. These were obtained through repeated measurements on a few different LB films surface points. Fitted fluorescence lifetimes and amplitudes from LB films of 2 in the two left columns. “top” and “den” (denominator) refer to the terms as defined in equation 2.

| $\tau$ /ns | amp/a.u. | top      | den      | sum top  | sum den  | $\langle \tau \rangle$ /ns | Chi sq |
|------------|----------|----------|----------|----------|----------|----------------------------|--------|
| 2 blank    |          |          |          |          |          |                            |        |
| 0.458      | 0.174    | 0.036499 | 0.079692 | 17.40797 | 3.926276 | 4.433712                   | 0.916  |
| 1.6235     | 0.4211   | 1.109915 | 0.683656 |          |          |                            |        |
| 5.1413     | 0.6152   | 16.26156 | 3.162928 |          |          |                            |        |

|                |          |          |          |          |          |          |       |
|----------------|----------|----------|----------|----------|----------|----------|-------|
| <b>2 NiO</b>   |          |          |          |          |          |          |       |
| 0.3149         | 0.2275   | 0.022559 | 0.07164  | 8.125253 | 2.237888 | 3.630768 | 0.872 |
| 1.3375         | 0.3728   | 0.666904 | 0.49862  |          |          |          |       |
| 4.4589         | 0.374    | 7.435789 | 1.667629 |          |          |          |       |
| <b>2 Bis A</b> |          |          |          |          |          |          |       |
| 0.081          | 0.176    | 0.001155 | 0.014256 | 0.695638 | 0.661641 | 1.051383 | 1.014 |
| 0.7442         | 0.7442   | 0.412163 | 0.553834 |          |          |          |       |
| 3.0178         | 0.031    | 0.282321 | 0.093552 |          |          |          |       |
| <b>2 HA</b>    |          |          |          |          |          |          |       |
| 0.0324         | 5.17E-01 | 0.000543 | 0.016764 | 0.1748   | 0.076255 | 2.292314 | 0.994 |
| 0.6546         | 0.0298   | 0.012769 | 0.019507 |          |          |          |       |
| 4.0388         | 9.90E-03 | 0.161488 | 0.039984 |          |          |          |       |
| <b>2 HSA</b>   |          |          |          |          |          |          |       |
| 0.0668         | 5.36E-02 | 0.000239 | 0.00358  | 0.706379 | 0.167842 | 4.2086   | 0.955 |
| 0.8081         | 0.0269   | 0.017566 | 0.021738 |          |          |          |       |
| 4.8313         | 2.95E-02 | 0.688573 | 0.142523 |          |          |          |       |

**Table S3.** The complete set data from the time-resolved fluorescence microscopy experiments for the data that is presented in figure 6 but without uncertainties. These were obtained through repeated measurements on a few different LB films surface points. Fitted fluorescence lifetimes and amplitudes from LB films of 3 in the two left columns. “top” and “den” (denominator) refer to the terms as defined in equation 2.

| $\tau$ /ns     | amp/a.u. | top      | den      | sum top  | sum den  | $\langle \tau \rangle$ /ns | Chi sq |
|----------------|----------|----------|----------|----------|----------|----------------------------|--------|
| <b>3 blank</b> |          |          |          |          |          |                            |        |
| 0.1574         | 0.4375   | 0.010839 | 0.068863 | 0.189762 | 0.200533 | 0.946287                   | 0.904  |
| 0.486          | 0.1516   | 0.035807 | 0.073678 |          |          |                            |        |
| 2.4678         | 0.0235   | 0.143116 | 0.057993 |          |          |                            |        |
|                |          |          |          |          |          |                            |        |

|         |          |          |          |          |          |          |       |
|---------|----------|----------|----------|----------|----------|----------|-------|
| 3 NiO   |          |          |          |          |          |          |       |
| 0.0334  | 0.9687   | 0.001081 | 0.032355 | 0.850008 | 0.339244 | 2.505592 | 1.151 |
| 0.4523  | 0.1955   | 0.039994 | 0.088425 |          |          |          |       |
| 3.7028  | 0.059    | 0.808933 | 0.218465 |          |          |          |       |
|         |          |          |          |          |          |          |       |
| 3 Bis A |          |          |          |          |          |          |       |
| 0.0898  | 0.2838   | 0.002289 | 0.025485 | 0.104653 | 0.109065 | 0.959554 | 1.434 |
| 0.5784  | 0.0881   | 0.029474 | 0.050957 |          |          |          |       |
| 2.2344  | 0.0146   | 0.072891 | 0.032622 |          |          |          |       |
|         |          |          |          |          |          |          |       |
| 3 HA    |          |          |          |          |          |          |       |
| 0.0478  | 3.11E-01 | 0.000709 | 0.014842 | 0.081233 | 0.064137 | 1.266564 | 0.956 |
| 0.5239  | 0.0515   | 0.014135 | 0.026981 |          |          |          |       |
| 2.9752  | 7.50E-03 | 0.066389 | 0.022314 |          |          |          |       |
|         |          |          |          |          |          |          |       |
| 3 HSA   |          |          |          |          |          |          |       |
| 0.1331  | 0.8534   | 0.015119 | 0.113588 | 0.282611 | 0.310883 | 0.909058 | 0.947 |
| 0.4989  | 0.2089   | 0.051995 | 0.10422  |          |          |          |       |
| 2.3153  | 0.0402   | 0.215497 | 0.093075 |          |          |          |       |

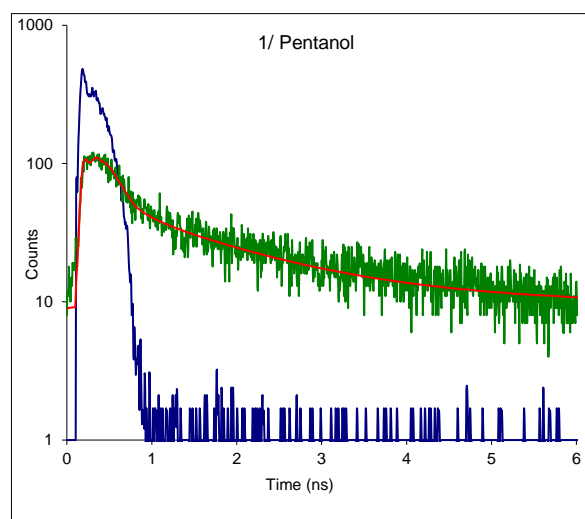

| Amp1   | Tau1 (ns) | Yield1 %  |
|--------|-----------|-----------|
| 0.0020 | 0.2098    | 8.8280    |
| Amp2   | Tau2 (ns) | Yield 2 % |
| 0.0021 | 1.5192    | 66.4782   |
| Amp3   | Tau3 (ns) | Yield 3 % |
| 0.0448 | 0.0258    | 24.2739   |

**Figure S5.** The LB film of **1** after exposure of a droplet of pentanol. Green is raw data, orange is fitted function and blue is IRF used in the fitting procedure. Decay fitted to a sum of three exponentials and outcome from the fitting procedure shown in the table immediately below the figure of the decay. The kinetic component with a lifetime of ~26 ps (Tau 3 in this table) does not appear in the pristine LB film **1** or for LB film **1**s with any of the target analyte exposures. We therefore attribute this component to DADQ molecules in solution, detached from the surface due to pentanol exposure.



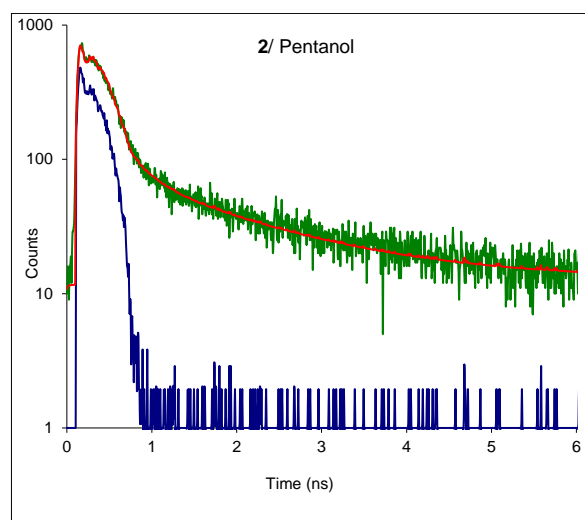

| Amp1   | Tau1 (ns) | Yield1 %  |
|--------|-----------|-----------|
| 0.0089 | 0.2543    | 14.3633   |
| Amp2   | Tau2 (ns) | Yield 2 % |
| 0.0036 | 1.4974    | 34.4070   |
| Amp3   | Tau3 (ns) | Yield 3 % |
| 1.1672 | 0.0069    | 51.2297   |

**Figure S6.** The LB film of **2** after exposure of a droplet of pentanol. Green is raw data, orange is fitted function and blue is IRF used in the fitting procedure. Decay fitted to a sum of three exponentials and outcome from the fitting procedure shown in the table immediately below the figure of the decay. The kinetic component with a lifetime of ~70 ps has the highest yield of all three decay phases as seen in the table above, and higher than what was observed for LB films of **2** with HSA exposure. We therefore attribute this component to DADQ molecules in solution, detached from the surface due to pentanol exposure.

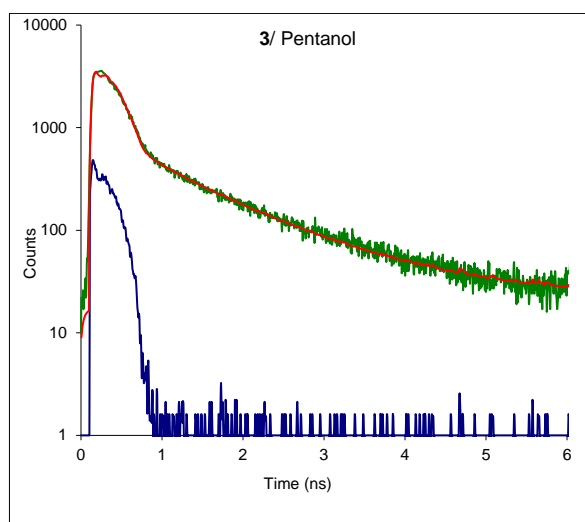

| Amp1        | Tau1 (ns)   | Yield1 %  |
|-------------|-------------|-----------|
| 0.030467022 | 1.160115106 | 37.7571   |
| Amp2        | Tau2 (ns)   | Yield 2 % |
| 0.015121123 | 0.401018357 | 6.4776    |
| Amp3        | Tau3 (ns)   | Yield 3 % |
| 1.643847351 | 0.031756668 | 55.7653   |

**Figure S7.** The LB film of 3 after exposure of a droplet of pentanol. Green is raw data, orange is fitted function and blue is IRF used in the fitting procedure. Decay fitted to a sum of three exponentials and outcome from the fitting procedure shown in the table immediately below the figure of the decay.
